# Supplementary material
Source: PubMed Central journal article supplement (PMC6987657)
Supplement: mmc2.pdf [file mmc2.pdf]

## Supplement B: Tables whole brain activation

**Table B1** Peak activation for delay period manipulation > maintenance before practice

| z-value                     | # voxels | peak voxels |     |                                                           | Region                                                                                                    |
|-----------------------------|----------|-------------|-----|-----------------------------------------------------------|-----------------------------------------------------------------------------------------------------------|
|                             |          | x           | y   | z                                                         |                                                                                                           |
| <b>Adults</b>               |          |             |     |                                                           |                                                                                                           |
| <i>Cluster 1</i>            |          | 18048       |     | <i>Frontal Cortex</i>                                     |                                                                                                           |
| 5.13                        |          | -32         | 0   | 60                                                        | Middle Frontal Gyrus                                                                                      |
| 5.12                        |          | 28          | 4   | 60                                                        | Superior Frontal Gyrus, Middle Frontal Gyrus                                                              |
| 4.77                        |          | -48         | 4   | 50                                                        | Precentral Gyrus, Middle Frontal Gyrus                                                                    |
| 4.73                        |          | 6           | 22  | 46                                                        | Paracingulate Gyrus, Superior Frontal Gyrus                                                               |
| 4.72                        |          | 36          | 24  | -2                                                        | Insular Cortex, Frontal Orbital Cortex                                                                    |
| 4.65                        |          | -58         | 10  | 16                                                        | Inferior Frontal Gyrus, pars opercularis, Precentral Gyrus                                                |
| <i>Cluster 2</i>            |          | 13901       |     | <i>Parietal Cortex</i>                                    |                                                                                                           |
| 4.64                        |          | 12          | -72 | 56                                                        | Lateral Occipital Cortex, superior division, Precuneus Cortex                                             |
| 4.62                        |          | -40         | -42 | 42                                                        | Supramarginal Gyrus, posterior division, Superior Parietal Lobule, Supramarginal Gyrus, anterior division |
| 4.56                        |          | 32          | -66 | -28                                                       | Cerebellum                                                                                                |
| 4.55                        |          | -40         | -44 | 50                                                        | Superior Parietal Lobule, Supramarginal Gyrus, posterior division                                         |
| 4.37                        |          | 36          | -46 | 40                                                        | Supramarginal Gyrus, posterior division, Superior Parietal Lobule, Angular Gyrus                          |
| 4.32                        |          | -32         | -56 | 62                                                        | Superior Parietal Lobule, Lateral Occipital Cortex, superior division                                     |
| <b>Children</b>             |          |             |     |                                                           |                                                                                                           |
| n.s.                        |          |             |     |                                                           |                                                                                                           |
| <b>Adults &gt; Children</b> |          |             |     |                                                           |                                                                                                           |
| <i>Cluster 1</i>            |          | 1211        |     | <i>Frontal Cortex, superior regions left hemisphere</i>   |                                                                                                           |
| 3.57                        |          | -34         | -4  | 58                                                        | Middle Frontal Gyrus, Precentral Gyrus                                                                    |
| 3.4                         |          | -48         | 4   | 50                                                        | Precentral Gyrus, Middle Frontal Gyrus                                                                    |
| 3.25                        |          | -42         | 0   | 28                                                        | Precentral Gyrus                                                                                          |
| 2.91                        |          | -56         | 12  | 24                                                        | Inferior Frontal Gyrus, pars opercularis, Precentral Gyrus                                                |
| 2.35                        |          | -62         | 10  | 18                                                        | Precentral Gyrus                                                                                          |
| 2.34                        |          | -40         | 14  | 58                                                        | Middle Frontal Gyrus                                                                                      |
| <i>Cluster 2</i>            |          | 1122        |     | <i>Frontal Cortex, inferior regions left hemisphere</i>   |                                                                                                           |
| 3.23                        |          | -40         | 26  | 20                                                        | Inferior Frontal Gyrus, pars triangularis, Middle Frontal Gyrus, Inferior Frontal Gyrus, pars opercularis |
| 3.21                        |          | -34         | 24  | -10                                                       | Frontal Orbital Cortex                                                                                    |
| 3.17                        |          | -36         | 26  | 0                                                         | Frontal Orbital Cortex, Frontal Operculum Cortex, Insular Cortex                                          |
| 2.94                        |          | -60         | 22  | 0                                                         | Inferior Frontal Gyrus, pars opercularis, Inferior Frontal Gyrus, pars triangularis                       |
| 2.62                        |          | -44         | 34  | 32                                                        | Middle Frontal Gyrus, Frontal Pole                                                                        |
| 2.4                         |          | -42         | 24  | 36                                                        | Middle Frontal Gyrus                                                                                      |
| <i>Cluster 3</i>            |          | 1113        |     | <i>Lateral Occipital Cortex, Superior Parietal Cortex</i> |                                                                                                           |
| 3.91                        |          | 8           | -72 | 58                                                        | Lateral Occipital Cortex, superior division, Precuneus Cortex                                             |
| 3.58                        |          | 14          | -72 | 56                                                        | Lateral Occipital Cortex, superior division                                                               |
| 3.58                        |          | -14         | -74 | 58                                                        | Lateral Occipital Cortex, superior division                                                               |
| 3.44                        |          | -28         | -72 | 56                                                        | Lateral Occipital Cortex, superior division                                                               |
| 3.34                        |          | -30         | -68 | 58                                                        | Lateral Occipital Cortex, superior division                                                               |
| 3.32                        |          | -32         | -72 | 54                                                        | Lateral Occipital Cortex, superior division                                                               |
| <i>Cluster 4</i>            |          | 1082        |     | <i>Frontal Cortex, left hemisphere</i>                    |                                                                                                           |
| 3.52                        |          | 28          | 4   | 62                                                        | Superior Frontal Gyrus, Middle Frontal Gyrus                                                              |
| 3.3                         |          | 56          | 8   | 44                                                        | Precentral Gyrus, Middle Frontal Gyrus                                                                    |
| 3.07                        |          | 50          | 8   | 52                                                        | Middle Frontal Gyrus                                                                                      |

|      |    |    |    |                                                            |
|------|----|----|----|------------------------------------------------------------|
| 2.95 | 58 | 12 | 28 | Precentral Gyrus, Inferior Frontal Gyrus, pars opercularis |
| 2.51 | 50 | 20 | 48 | Middle Frontal Gyrus                                       |

Thresholded at  $p < .05$ , cluster corrected (using clusters determined by  $z > 2.3$ )

Coordinates are in MNI space

**Table B2** Peak activation in children for delay period manipulation > maintenance after practice

| z-value                                                                       | # voxels | peak voxels |     |    | Region                                                                                               |
|-------------------------------------------------------------------------------|----------|-------------|-----|----|------------------------------------------------------------------------------------------------------|
|                                                                               |          | x           | y   | z  |                                                                                                      |
| <b>Cluster corrected at <math>z &gt; 2.3</math>, <math>p &lt; 0.05</math></b> |          |             |     |    |                                                                                                      |
| <i>Cluster 1</i>                                                              | 3001     |             |     |    | <i>Occipital Cortex</i>                                                                              |
| 3.73                                                                          |          | 6           | -72 | 8  | Intracalcarine Cortex, Lingual Gyrus                                                                 |
| 3.71                                                                          |          | -12         | -74 | 4  | Intracalcarine Cortex, Lingual Gyrus                                                                 |
| 3.68                                                                          |          | 18          | -68 | 0  | Lingual Gyrus, Intracalcarine Cortex                                                                 |
| 3.6                                                                           |          | 4           | -76 | 16 | Supracalcarine Cortex, Cuneal Cortex, Intracalcarine Cortex                                          |
| 3.4                                                                           |          | 8           | -84 | 6  | Intracalcarine Cortex                                                                                |
| 3.14                                                                          |          | 18          | -68 | 14 | Intracalcarine Cortex, Supracalcarine Cortex                                                         |
| <i>Cluster 2</i>                                                              | 1339     |             |     |    | <i>Superior Parietal Cortex</i>                                                                      |
| 3.73                                                                          |          | -34         | -42 | 48 | Superior Parietal Lobule, Postcentral Gyrus                                                          |
| 3.7                                                                           |          | -36         | -38 | 38 | Supramarginal Gyrus, anterior division, Postcentral Gyrus                                            |
| 3.15                                                                          |          | -28         | -50 | 56 | Superior Parietal Lobule                                                                             |
| 2.97                                                                          |          | -26         | -52 | 42 | Superior Parietal Lobule                                                                             |
| 2.89                                                                          |          | -18         | -62 | 44 | Lateral Occipital Cortex, superior division                                                          |
| 2.86                                                                          |          | -22         | -56 | 58 | Superior Parietal Lobule, Lateral Occipital Cortex, superior division                                |
| <b>Uncorrected at <math>p &lt; .001</math></b>                                |          |             |     |    |                                                                                                      |
| <i>Cluster 1</i>                                                              | 647      |             |     |    |                                                                                                      |
| 3.73                                                                          |          | 6           | -72 | 8  | Intracalcarine Cortex, Lingual Gyrus                                                                 |
| 3.71                                                                          |          | -12         | -74 | 4  | Intracalcarine Cortex, Lingual Gyrus                                                                 |
| 3.68                                                                          |          | 18          | -68 | 0  | Lingual Gyrus, Intracalcarine Cortex                                                                 |
| 3.6                                                                           |          | 4           | -76 | 16 | Supracalcarine Cortex, Cuneal Cortex, Intracalcarine Cortex                                          |
| 3.4                                                                           |          | 8           | -84 | 6  | Intracalcarine Cortex                                                                                |
| 3.14                                                                          |          | 18          | -68 | 14 | Intracalcarine Cortex, Supracalcarine Cortex                                                         |
| <i>Cluster 2</i>                                                              | 233      |             |     |    |                                                                                                      |
| 3.73                                                                          |          | -34         | -42 | 48 | Superior Parietal Lobule, Postcentral Gyrus                                                          |
| 3.7                                                                           |          | -36         | -38 | 38 | Supramarginal Gyrus, anterior division, Postcentral Gyrus                                            |
| 3.15                                                                          |          | -28         | -50 | 56 | Superior Parietal Lobule                                                                             |
| <i>Cluster 3</i>                                                              | 113      |             |     |    |                                                                                                      |
| 3.75                                                                          |          | 10          | -64 | 52 | Precuneus Cortex, Lateral Occipital Cortex, superior division                                        |
| 3.36                                                                          |          | 22          | -60 | 48 | Lateral Occipital Cortex, superior division                                                          |
| <i>Cluster 4</i>                                                              | 110      |             |     |    |                                                                                                      |
| 3.84                                                                          |          | 30          | 4   | 50 | Middle Frontal Gyrus                                                                                 |
| <i>Cluster 5</i>                                                              | 77       |             |     |    |                                                                                                      |
| 3.62                                                                          |          | -32         | 24  | 0  | Insular Cortex, Frontal Orbital Cortex                                                               |
| <i>Cluster 6</i>                                                              | 37       |             |     |    |                                                                                                      |
| 3.42                                                                          |          | -50         | -48 | 10 | Supramarginal Gyrus, posterior division, Middle Temporal Gyrus, temporooccipital part, Angular Gyrus |
| <i>Cluster 7</i>                                                              | 22       |             |     |    |                                                                                                      |
| 3.41                                                                          |          | 34          | 20  | -2 | Insular Cortex                                                                                       |
| <i>Cluster 8</i>                                                              | 9        |             |     |    |                                                                                                      |
| 3.28                                                                          |          | -6          | 12  | 56 | Superior Frontal Gyrus, Paracingulate Gyrus                                                          |

Coordinates are in MNI space

**Table B3** Peak activation in children for delay period manipulation > maintenance in a subset of correct trials after practice

| z-value                                                          | # voxels | peak voxels |     |    | Region                                                                                               |
|------------------------------------------------------------------|----------|-------------|-----|----|------------------------------------------------------------------------------------------------------|
|                                                                  |          | x           | y   | z  |                                                                                                      |
| <b>Cluster corrected at <math>z &gt; 2.3, p &lt; 0.05</math></b> |          |             |     |    |                                                                                                      |
| <i>Cluster 1</i>                                                 | 2545     |             |     |    |                                                                                                      |
| 3.38                                                             |          | 18          | -70 | 4  | Intracalcarine Cortex, Lingual Gyrus                                                                 |
| 3.35                                                             |          | 16          | -72 | 10 | Intracalcarine Cortex                                                                                |
| 3.23                                                             |          | -18         | -76 | 2  | Intracalcarine Cortex, Lingual Gyrus                                                                 |
| 3.05                                                             |          | 6           | -82 | 6  | Intracalcarine Cortex, Supracalcarine Cortex, Lingual Gyrus                                          |
| 3                                                                |          | -12         | -68 | -2 | Lingual Gyrus                                                                                        |
| 2.82                                                             |          | -36         | -68 | -4 | Lateral Occipital Cortex, inferior division                                                          |
| <b>Uncorrected at <math>p &lt; .001</math></b>                   |          |             |     |    |                                                                                                      |
| <i>Cluster 1</i>                                                 | 127      |             |     |    |                                                                                                      |
| 3.38                                                             |          | 18          | -70 | 4  | Intracalcarine Cortex, Lingual Gyrus                                                                 |
| 3.35                                                             |          | 16          | -72 | 10 | Intracalcarine Cortex                                                                                |
| <i>Cluster 2</i>                                                 | 87       |             |     |    |                                                                                                      |
| 3.45                                                             |          | -34         | -42 | 48 | Superior Parietal Lobule, Postcentral Gyrus                                                          |
| <i>Cluster 3</i>                                                 | 53       |             |     |    |                                                                                                      |
| 3.55                                                             |          | 30          | 6   | 52 | Middle Frontal Gyrus                                                                                 |
| <i>Cluster 4</i>                                                 | 23       |             |     |    |                                                                                                      |
| 3.38                                                             |          | 24          | -60 | 48 | Lateral Occipital Cortex, superior division                                                          |
| 3.3                                                              |          | 24          | -58 | 52 | Lateral Occipital Cortex, superior division, Superior Parietal Lobule                                |
| <i>Cluster 5</i>                                                 | 18       |             |     |    |                                                                                                      |
| 3.32                                                             |          | -50         | -48 | 10 | Supramarginal Gyrus, posterior division, Middle Temporal Gyrus, temporooccipital part, Angular Gyrus |
| <i>Cluster 6</i>                                                 | 17       |             |     |    |                                                                                                      |
| 3.23                                                             |          | -18         | -76 | 2  | Intracalcarine Cortex, Lingual Gyrus                                                                 |
| <i>Cluster 7</i>                                                 | 10       |             |     |    |                                                                                                      |
| 3.31                                                             |          | 10          | -68 | 50 | Precuneus Cortex, Lateral Occipital Cortex, superior division                                        |

Coordinates are in MNI space
