# Supplementary material
Source: PubMed Central journal article supplement (PMC6987657)
Supplement: mmc3.pdf [file mmc3.pdf]

## Supplement C: Grey matter correction

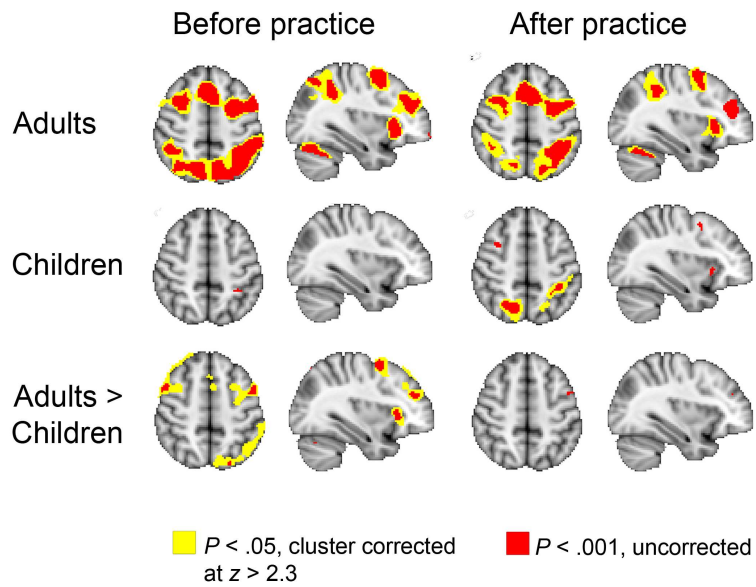

**Figure C1** Whole-brain delay period activation for manipulation > maintenance when grey matter information was included in the analyses. Results were very similar as the results without grey matter correction. There were some minor differences at the uncorrected threshold of  $p < .001$ , however, most of these differences could be attributed to the fact that for this analysis, group variance could not be modeled separately (as was the case for the analyses without grey matter correction). Images are overlaid on axial ( $z = 50$ ) and sagittal ( $x = 34$ ) slices of a standard anatomical image. The left of the image is the right of the brain.
