# Supplementary material
Source: PubMed Central journal article supplement (PMC6987657)
Supplement: mmc4.pdf [file mmc4.pdf]

## Supplement D: Results control group

To control for test-retest effects, we performed ROI analyses based on data from a control group of six children who participated in the two test sessions before and after practice, but did not receive any instructions during the six weeks between these sessions. For both ROIs (i.e., left and right DLPFC), we performed a repeated-measures ANOVA with time (before and after practice) and condition (maintenance and manipulation) as within-subject variables. For both regions, we did not find any significant main effects of time (Supplementary Fig. D1; RDLPFC:  $F(1,5) = 0.70, p = .44, \eta^2 = .12$ ; LDLPFC:  $F(1,5) = 0.13, p = .74, \eta^2 = .03$ ) or condition (RDLPFC:  $F(1,5) = 0.49, p = .51, \eta^2 = .09$ ; LDLPFC:  $F(1,5) = 3.79, p = .11, \eta^2 = .43$ ), or an interaction between time and condition (RDLPFC:  $F(1,5) = 0.04, p = .85, \eta^2 = .008$ ; LDLPFC:  $F(1,5) = 0.38, p = .56, \eta^2 = .07$ ).

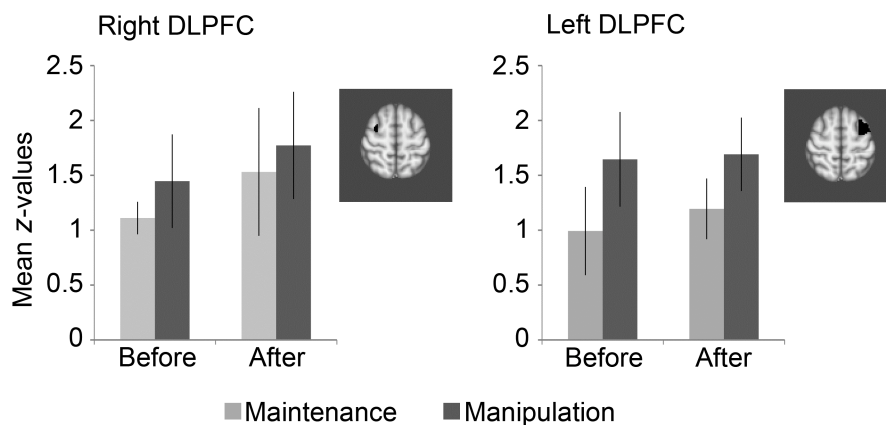

**Figure D1** Delay period activation in bilateral DLPFC for the control group (error bars show SEM).
